# Supplementary material for: Perturbation of hyperthermia resistance in gastric cancer by hyperstimulation of autophagy using artemisinin-protected iron-oxide nanoparticles
Source: Royal Society of Chemistry journal article supplement (doi:10.1039/d4ra05611f), 2024-01-01
Supplement: d4ra05611f1.pdf [file d4ra05611f1.pdf]

## Perturbation of Hyperthermia Resistance in Gastric Cancer by Hyperstimulation of Autophagy using Artemisinin-protected Iron-oxide Nanoparticles

Komal Attri<sup>1,4</sup>, Bhupendra Chudasama<sup>2,4\*</sup>, Roop L. Mahajan<sup>3,4\*</sup>, Diptiman Choudhury<sup>1,4\*</sup>

<sup>1</sup>Department of Chemistry and Biochemistry, Thapar Institute of Engineering and Technology, Patiala-147004, Punjab, India.

<sup>2</sup>Department of Physics and Material Sciences, Thapar Institute of Engineering and Technology, Patiala-147004, Punjab, India

<sup>3</sup>Department of Mechanical Engineering, Department of Materials Science & Engineering, Virginia Tech, Blacksburg, VA 24061, United States

<sup>4</sup>TIET-VT Centre of Excellence for Emerging Materials, Thapar Institute of Engineering and Technology, Patiala-147004 Punjab, India.

\*Corresponding E-mail: [diptiman@thapar.edu](mailto:diptiman@thapar.edu), [mahajanr@vt.edu](mailto:mahajanr@vt.edu), [bnchudasama@thapar.edu](mailto:bnchudasama@thapar.edu)

\*Corresponding Phone: +91-8196949843 / +1-5402312597 / +91-9781966136

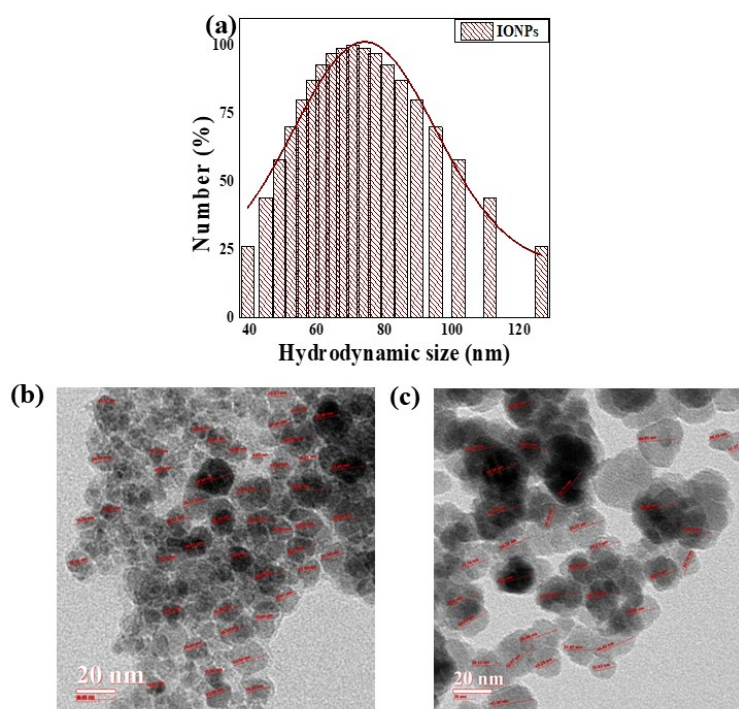

**Figure S1: DLS and HRTEM figures of IONPs and ART-MNPs** (a) It represents the DLS graph of IONPs having a size of 74 nm (b) HR-TEM image showing the size measurement of each particle of IONPs (c) HR-TEM image showing the size measurement of each particle of ART-MNPs.

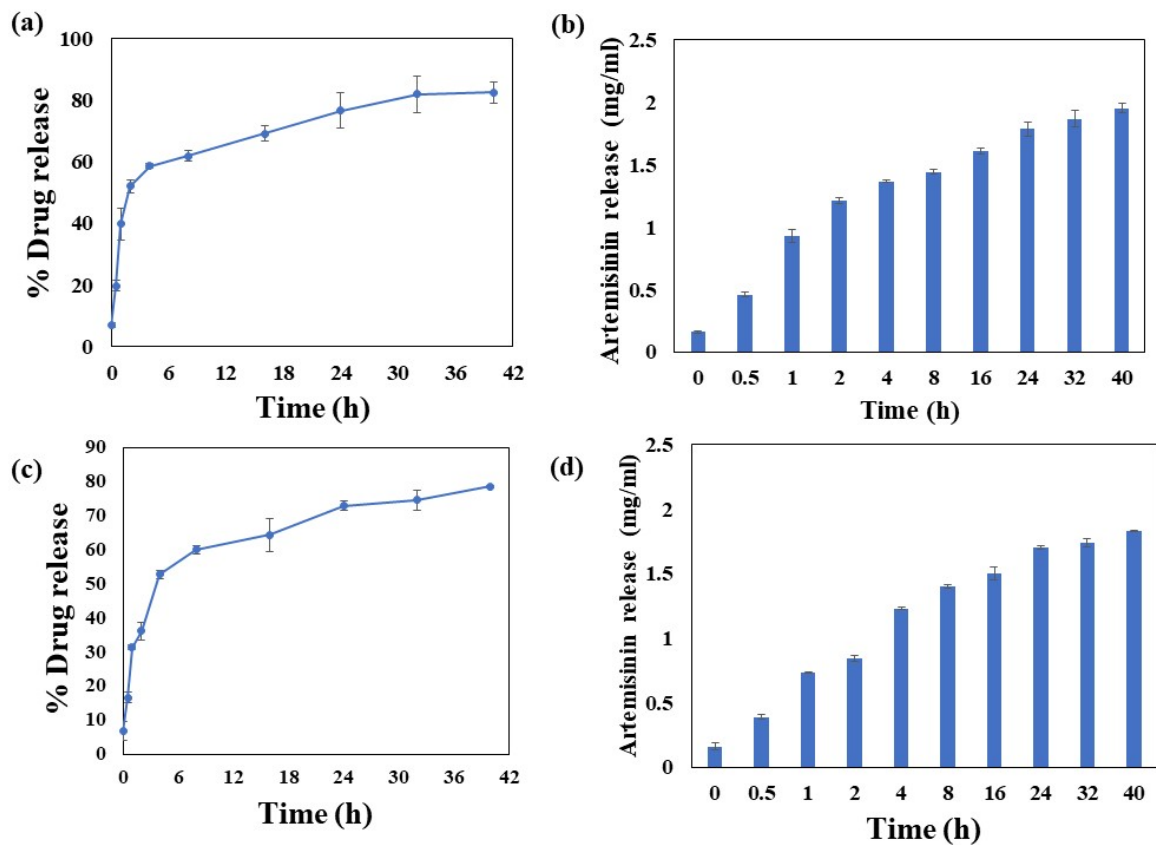

**Figure S2: Release kinetics of Artemisinin in gastric and tumor pH.** (a) The graph presents the drug release studies performed for assessing the percentage of ART released from ART-MNPs at gastric pH (3) (b) It illustrates the release rate of the drug in mg/ml at pH 3 per hour (c) The graph depicts the drug release studies conducted to evaluate the percentage of ART released from ART-MNPs at tumor pH (5.5) (d) It depicts the drug release rate in mg/ml per hour at tumor pH (5.5).

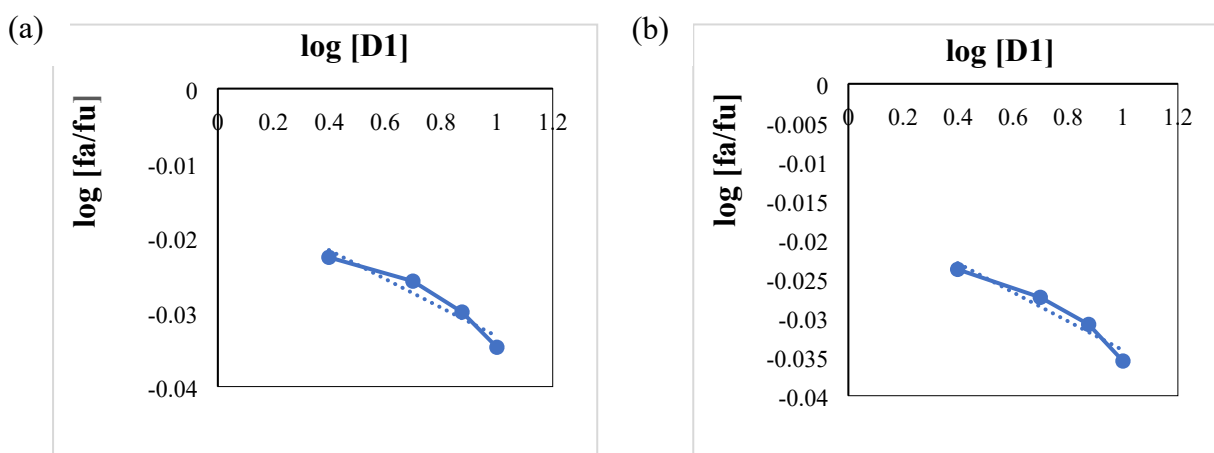

**Figure S3: Median plots of (a) ART and (b) MNPs for finding the y-intercept and m values to calculate  $D_m$  and determine the combination index of ART and MNPs.**

**Table S1** shows the p values calculated for % variation in cell viability after treatment with 2.5, 5, 7.5, and 10 µg/mL of ART, MNPs, and ART-MNPs without hyperthermia. The statistical significance of data is considered when the  $p < 0.05$

| <b>P value for checking the statistical significance of data (Without Hyperthermia)</b> |            |             |                 |
|-----------------------------------------------------------------------------------------|------------|-------------|-----------------|
| <b>Concentration</b>                                                                    | <b>ART</b> | <b>MNPs</b> | <b>ART-MNPs</b> |
| <b>2.5µg/mL</b>                                                                         | 0.002413   | 0.002773    | 0.00112         |
| <b>5µg/mL</b>                                                                           | 0.000477   | 0.008284    | 0.000152        |
| <b>7.5 µg/mL</b>                                                                        | 8.06E-05   | 0.017229    | 0.000152        |
| <b>10 µg/mL</b>                                                                         | 1.39E-06   | 0.002665    | 9.43E-07        |

**Table S2** shows the p values calculated for % variation in cell viability after treatment with 2.5, 5, 7.5, and 10 µg/mL of ART, MNPs, and ART-MNPs with hyperthermia. The statistical significance of data is considered when the  $p < 0.05$

| <b>P value for checking the statistical significance of data (With Hyperthermia)</b> |            |             |                 |
|--------------------------------------------------------------------------------------|------------|-------------|-----------------|
| <b>Concentration</b>                                                                 | <b>ART</b> | <b>MNPs</b> | <b>ART-MNPs</b> |
| <b>2.5µg/mL</b>                                                                      | 0.009367   | 0.009526    | 1.4201E-05      |
| <b>5µg/mL</b>                                                                        | 0.000869   | 0.000836    | 3.04E-05        |
| <b>7.5 µg/mL</b>                                                                     | 0.000336   | 0.000139    | 4.13E-06        |
| <b>10 µg/mL</b>                                                                      | 0.000212   | 6.07E-05    | 2.65E-06        |

**Table S3** shows the p values calculated for % variation in scratch diameter after treatment with 10 µg/ml of ART, MNPs, and ART-MNPs. The statistical significance of data is considered when the  $p < 0.05$ .

| <b>P value for checking the statistical significance of data</b> |            |             |                 |
|------------------------------------------------------------------|------------|-------------|-----------------|
| <b>Time</b>                                                      | <b>ART</b> | <b>MNPs</b> | <b>ART-MNPs</b> |
| <b>6h</b>                                                        | 0.054767   | 0.792443    | 0.004362        |
| <b>12h</b>                                                       | 0.000305   | 0.041174    | 0.000243        |
| <b>24h</b>                                                       | 0.004036   | 0.023064    | 0.001396        |
| <b>36h</b>                                                       | 0.01039    | 0.027416    | 0.004124        |
| <b>48h</b>                                                       | 0.00749    | 0.043244    | 0.006911        |

**Table S4** shows the p values calculated for % variation in the absorbance value of *H. pylori* after treatment with varying concentrations (2.5, 5, 7.5, 10 µg/ml) of ART, MNPs, and ART-MNPs. The statistical significance of data is considered when the  $p < 0.05$ .

| <b>P value is used to check the statistical significance of data for anti-<i>H. pylori</i> activity</b> |            |             |                 |
|---------------------------------------------------------------------------------------------------------|------------|-------------|-----------------|
|                                                                                                         | <b>ART</b> | <b>MNPs</b> | <b>ART-MNPs</b> |
| <b>2.5µg/mL</b>                                                                                         | 0.004458   | 0.00133     | 5.46E-05        |
| <b>5µg/mL</b>                                                                                           | 2.09E-05   | 7.73E-05    | 1.56E-05        |
| <b>7.5 µg/mL</b>                                                                                        | 1.1E-05    | 1.5E-05     | 5.43E-06        |
| <b>10 µg/mL</b>                                                                                         | 5.46E-06   | 0.000213    | 2.48E-06        |
